# Supplementary material for: Aeromonas spp. Prevalence, Virulence, and Antimicrobial Resistance in an Ex Situ Program for Threatened Freshwater Fish—A Pilot Study with Protective Measures
Source: MDPI journal article supplement (doi:10.3390/ani12040436), 2022-02-11
Supplement: s1 [file s1]

**Table 2.** Operation scheme of the assay.

| <b>Week</b>     | <b>Monday</b>                         | <b>Tuesday</b>                        | <b>Wednesday</b> | <b>Thursday</b>  | <b>Friday</b> | <b>Saturday</b> | <b>Sunday</b> |
|-----------------|---------------------------------------|---------------------------------------|------------------|------------------|---------------|-----------------|---------------|
| 1 <sup>st</sup> | Capture +<br>Transport                | Fasting                               | Feeding          | Water Renovation | Feeding       | Fasting         | Fasting       |
|                 | 1 <sup>st</sup> Bacterial<br>Sampling |                                       | Food<br>Sampling | Water Sampling   |               |                 |               |
| 2 <sup>nd</sup> | Feeding                               | 2 <sup>nd</sup> Bacterial<br>Sampling | Feeding          | Water Renovation | Feeding       | Fasting         | Fasting       |
|                 |                                       |                                       | Food<br>Sampling | Water Sampling   |               |                 |               |
| 3 <sup>rd</sup> | Feeding                               | 3 <sup>rd</sup> Bacterial<br>Sampling | Feeding          | Water Renovation | Feeding       | Fasting         | Fasting       |
|                 |                                       |                                       | Food<br>Sampling | Water Sampling   |               |                 |               |
| 4 <sup>th</sup> | Feeding                               | 4 <sup>th</sup> Bacterial<br>Sampling | Feeding          | Water Renovation | Feeding       | Fasting         | Fasting       |
|                 |                                       |                                       | Food<br>Sampling | Water Sampling   |               |                 |               |
| 5 <sup>th</sup> | Feeding                               | 5 <sup>th</sup> Bacterial<br>Sampling |                  |                  |               |                 |               |
